# Supplementary material
Source: Research Square preprint supplement (doi:10.21203/rs.3.rs-8834822/v1)
Supplement: Supplementary file 1 [file d57060f34a005a21fbae96c7.xlsx]

## Sheet: Sheet1
Age	Marital status		Education level		Cause of Priapism		Duration of priapism at presentation				Type of priapism		Intervention received			Pre op erectile function score			Timing of implant insertion			Duration of surgery		Intraoperative findings			Implant type use		Implant size use		Intraoperative complications			Post operative complication			Post op Erectile function score
2	1		4		1		3				1		1			1			1			2		8			1		2		1			1			5
2	1		4		1		3				1		1			1			1			2		8			1		2		1			1			5
2	1		4		1		3				1		1			1			1			2		8			1		2		1			2			5
2	1		4		1		3				1		5			1			1			2		10			1		2		1			2			5
3	1		4		1		3				1		5			1			1			2		10			1		2		1			3			5
3	1		5		1		3				1		5			1			1			2		10			1		2		1			3			5
2	1		5		1		3				1		3			1			1			2		10			1		2		1			3			5
2	1		3		1		3				3		3			1			1			2		10			1		2		1			3			5
2	2		3		1		3				3		2			1			1			2		10			1		2		1			3			5
2	2		3		1		3				3		2			1			1			2		10			1		2		1			3			5
2	2		3		1		3				1		2			1			1			2		10			1		1		1			3			5
2	2		2		1		3				1		2			1			1			2		10			1		1		1			3			5
3	1		2		1		3				1		2			1			1			2		11			1		1		2			4			5
3	1		4		1		3				1		2			1			1			2		11			1		1		3			4			6
3	1		4		1		3				1		2			1			1			2		11			1		1		3			5			6
3	1		4		1		3				1		2			1			1			2		11			1		2		3			5			5
3	1		4		2		3				1		5			1			1			2		11			1		2		1			5			5
2	1		4		2		3				3		5			1			1			2		11			1		2		1			5			5
2	1		4		2		3				3		2			1			1			2		10			1		2		1			5			5
2	2		4		2		3				1		2			1			1			2		10			1		2		1			5			5
2	2		5		3		3				1		2			1			1			2		11			1		2		1			5			5
2	2		5		3		3				1		2			1			1			2		11			1		2		1			5			5
2	2		4		3		3				1		2			1			1			2		10			1		2		1			5			5
2	3		4		3		3				1		2			6			2			3		8			1		2		1			5			5
4	3		4		3		3				1		4			6			2			3		8			1		2		1			5			5
4	3		4		1		2				1		4			6			2			3		8			1		2		1			5			5
5	2		4		1		2				1		6			6			2			3		2			1		2		1			5			5
2	2		4		1		3				1		6			6			2			3		2			1		2		1			5			5
2	2		4		1		3				1		3			6			2			3		2			1		2		1			5			5
2	1		4		1		3				1		3			6			2			4		2			1		2		1			5			5
3	1		3		1		3				1		3			6			2			4		2			1		2		1			5			5
3	1		2		1		3				1		1			6			2			4		2			1		2		1			5			5
3	1		2		1		3				3		1			6			2			4		2			1		2		1			5			5
3	1		4		1		3				3		2			6			2			4		2			1		2		1			5			5
3	1		4		4		3				3		2			6			2			3		2			1		2		1			5			5
2	1		5		5		3				3		2			6			2			3		2			1		2		1			5			5
2	1		4		5		3				3		7			6			2			3		2			1		2		1			5			5
5	1		5		1		3				3		7			6			2			3		2			1		2		1			5			5
5	1		4		1		2				3		5			6			2			3		2			1		2		1			5			5
2	1		4		1		3				1		5			6			2			3		2			1		2		1			5			5
2	1		4		1		3				1		5			6			2			3		2			1		2		1			5			5
3	2		4		1		3				1		2			6			2			4		2			1		2		1			5			5
3	2		4		1		3				1		2			6			2			4		2			1		2		1			5			5
4	2		4		1		3				1		2			6			2			4		2			1		2		1			5			5
4	2		4		4		3				1		2			6			2			4		2			1		2		1			5			5
2	1		5		3		3				1		2			6			2			4		2			1		2		1			5			5

## Sheet: Sheet2
A		B		C			D				E	F		G			H			I						J1	J2	K1							L			M	N1				N2				O1
1- <20 years		1- Single		1- None			1- SCD				1- <6hrs	1- Ischaemic		1-None			1- 1-10 severe			1- Early within acute phase						1- <1hr	1- <1hr	1- Fresh venous blood							1- Malleable (Shah's)			1- 9inch	1- None				1- None				1- Persistent pain
2- 20-29		2-Married		2- informal education			2- Ingestion of aprodisiacs				2- 6-24hrs	2- Non- Ischaemic		2- Hydration and analgesics			2- 11-16 moderate			2- Delayed (after development of corporeal fibrosis						2- 1-2hrs	2- 1-2hrs	2- Dark tarry blood							2- Inflatable			2- 11inch	2- Corporal perforation				2- Corporal perforation				2-Haematoma collection
3- 30-39		3- Divorced/ Widow		3- Primary Level			3- Ingestion of traditional concoctions				3- >24hrs	3- stuttering		3- Corporal aspiration			3- 17-21 mild to moderate									3-2-3hrs	3-2-3hrs	3- whole coporeal fibrosis (bilateral)							3- Malleable (others			3- 13inch	3- Implant- corpora legnth disproportion				3- Implant- corpora legnth disproportion				3-SSI
4- 40- 49				4-Secondary			4-others							4- Shunts			4- 22-25 mild									4- 3-4hrs	4- 3-4hrs	4- Distal corporeal fibrosis (bilateral										4- others	4- others				4- others				4- Implant infection
5- >49				5- undergraduate			5- None							5- 2+3			5-Normal erectile function									5>4hrs	5>4hrs	5- Proximal coporeal fibrosis (bilateral																			5-None
				6- Graduate										6-2+4			6- Not Applicable											6- Multiple sites fibrosis (bilateral
				7- postgraduate										7-2+3+4														7- unilateral fibrosis
																												8- 1+3
																												9-1+4
																												10- 1+5
																												11- 1+6
[truncated: 2 more columns]
